# Supplementary material for: Infodemiology of RSV in Italy (2017–2022): An Alternative Option for the Surveillance of Incident Cases in Pediatric Age?
Source: MDPI journal article supplement (doi:10.3390/children9121984), 2022-12-16
Supplement: s1 [file s1]

**Supplementary Table S1.** Comparison in search volumes before and after December 2019.

| Research Field              | Up to December 2019<br>(Average $\pm$ SD) | After December 2019<br>(Average $\pm$ SD) | Student's t test for unpaired data with Welch correction (p value) |
|-----------------------------|-------------------------------------------|-------------------------------------------|--------------------------------------------------------------------|
| Google Trends™              |                                           | Relative Search Volumes                   |                                                                    |
| Bronchiolitis               | 14.40 $\pm$ 8.44                          | 14.68 $\pm$ 20.83                         | 0.915                                                              |
| RSV                         | 3.13 $\pm$ 1.19                           | 4.26 $\pm$ 11.11                          | 0.377                                                              |
| Respiratory Syncytial Virus | 2.03 $\pm$ 3.70                           | 5.28 $\pm$ 14.00                          | 0.052                                                              |
| Bronchitis                  | 46.42 $\pm$ 15.44                         | 34.73 $\pm$ 18.23                         | < 0.001                                                            |
| Pneumonia                   | 8.35 $\pm$ 2.38                           | 17.15 $\pm$ 15.72                         | < 0.001                                                            |
| Fever                       | 26.82 $\pm$ 9.14                          | 34.51 $\pm$ 12.58                         | < 0.001                                                            |
| Cough                       | 44.10 $\pm$ 12.13                         | 44.10 $\pm$ 12.13                         | 0.540                                                              |
| Sneezing                    | 19.03 $\pm$ 6.32                          | 36.90 $\pm$ 14.20                         | < 0.001                                                            |
| Wheezing                    | 13.60 $\pm$ 17.29                         | 10.94 $\pm$ 12.16                         | 0.288                                                              |
| Decrease in appetite        | 28.87 $\pm$ 9.21                          | 32.40 $\pm$ 10.72                         | 0.042                                                              |
| Respiratory Failure         | 28.26 $\pm$ 11.52                         | 31.78 $\pm$ 17.30                         | 0.152                                                              |
| Runny Nose                  | 10.81 $\pm$ 5.65                          | 27.24 $\pm$ 14.03                         | < 0.001                                                            |
| Common Cold                 | 24.23 $\pm$ 5.06                          | 30.53 $\pm$ 16.48                         | 0.002                                                              |
| Influenza                   | 14.66 $\pm$ 10.98                         | 17.32 $\pm$ 18.14                         | 0.286                                                              |
| Wikipedia                   |                                           | Daily Visualizations                      |                                                                    |
| Bronchiolitis               | 90.70 $\pm$ 60.64                         | 49.20 $\pm$ 65.99                         | < 0.001                                                            |
| Influenza                   | 301.46 $\pm$ 140.82                       | 840.92 $\pm$ 1559.29                      | 0.003                                                              |
| Respiratory Syncytial Virus | 33.87 $\pm$ 11.17                         | 132.22 $\pm$ 322.68                       | 0.009                                                              |
| Bronchitis                  | 303.39 $\pm$ 146.57                       | 104.24 $\pm$ 107.17                       | < 0.001                                                            |
| Pneumonia                   | 601.18 $\pm$ 160.26                       | 668.74 $\pm$ 974.86                       | 0.549                                                              |

**Supplementary Table S2.** Outline of variables included in Regression Analysis.

| Variables                                  | Model 1 | Model 2   | Model 3    |
|--------------------------------------------|---------|-----------|------------|
| ILI, incidence rates<br>(outcome variable) | Total   | 0-4 years | 5-14 years |
| Google Trends™<br>(explanatory variables)  |         |           |            |
| Bronchiolitis                              | YES     | YES       | YES        |
| RSV                                        | NO      | NO        | NO         |
| Respiratory Syncytial Virus                | YES     | YES       | YES        |
| Bronchitis                                 | YES     | YES       | YES        |
| Pneumonia                                  | YES     | NO        | YES        |
| Fever                                      | YES     | YES       | YES        |

|                             |     |     |     |
|-----------------------------|-----|-----|-----|
| Cough                       | YES | YES | YES |
| Sneezing                    | NO  | NO  | NO  |
| Wheezing                    | NO  | NO  | NO  |
| Decrease in appetite        | YES | YES | YES |
| Respiratory Failure         | NO  | NO  | NO  |
| Running Nose                | NO  | NO  | NO  |
| Common Cold                 | YES | YES | YES |
| Influenza                   | YES | YES | YES |
| Wikipedia                   |     |     |     |
| Bronchiolitis               | YES | YES | YES |
| Influenza                   | YES | YES | YES |
| Respiratory Syncytial Virus | YES | YES | YES |
| Bronchitis                  | YES | NO  | YES |
| Pneumonia                   | YES | NO  | NO  |

**Supplementary Table S3** Summary of regression analysis models.

| Model | R     | R square | SE   | F      | P value |
|-------|-------|----------|------|--------|---------|
| 1     | 0.867 | 0.752    | 1.83 | 27.113 | < 0.001 |
| 2     | 0.851 | 0.725    | 3.51 | 25.526 | < 0.001 |
| 3     | 0.804 | 0.646    | 6.44 | 21.216 | < 0.001 |

Note: SE = Standard error of the estimate
